1 **Authors:** Anderson Matos Medina

2 **Title:** Climatic stability and resource availability explains dung beetles (Scarabaeinae)  
3 richness pattern on the Americas

4 **Authors affiliation:** Programa de Pós-Graduação em Ecologia e Evolução, Instituto de  
5 Ciências Biológicas, Universidade Federal de Goiás, Goiânia, Goiás, Brazil  
6 E-mail address: bojaum@gmail.com

7 **Abstract:** Climatic conditions are the main driver of species richness. Specifically, the  
8 increase in climatic instability may reduce species richness directly and indirectly by  
9 reducing resources available. This hypothesis is evaluated here using a producer-  
10 consumer interaction to explain dung beetle richness on a continental scale (America)  
11 using mammal richness as resource proxy and temperature and precipitation seasonality  
12 as a proxy for climatic instability. A spatial path analysis was built in order to evaluate  
13 this hypothesis while controlling for spatial autocorrelation and differences in the  
14 sampling effort and abundance of each study (n=115) gathered from the literature. Dung  
15 beetle richness was directly explained by temperature seasonality, precipitation  
16 seasonality, and mammal richness, whereas only precipitation seasonality had an effect  
17 modulated by mammal richness. This result reinforces the notion that species richness  
18 can be explained by climatic conditions, but also reveals the importance of biotic  
19 interactions in order to understand the mechanisms behind such patterns.

20 **Keywords:** climatic instability, resource diversity, dung beetle diversity, mammal  
21 richness, Scarabaeidae

22 **Declarations of interest:** none.

### 23 **Acknowledgments**

24 I received a scholarship from Coordenação de Aperfeiçoamento de Pessoal de Nível  
25 Superior (CAPES). I am also grateful for the effort of all authors that sampled dung  
26 beetle communities used as source data for this study.

## 27 **Introduction**

28           Latitudinal diversity gradients are a widespread pattern in ecology (Gaston 2000;  
29 Willig et al. 2003; Hillebrand 2004). To understand latitudinal gradient one must go  
30 beyond the pattern and therefore evaluate causal hypotheses, which encompass three  
31 types of explanations: ecological, historical and evolutionary (Gaston 2000; Hawkins  
32 and Diniz-Filho 2004; Mittelbach et al. 2007). Examples of hypotheses proposed for  
33 this geographic pattern are productivity, environmental heterogeneity, area, historical  
34 factors and biotic interactions (Willig et al. 2003; Field et al. 2009). Among the above  
35 mentioned, climatic hypotheses are between the most used explanations behind the  
36 pattern of latitudinal diversity gradients (Field et al. 2009). However, climatic stability  
37 can have different weights in determining the latitudinal gradient. One rationale is  
38 climatic stability is more important to determine the latitudinal gradient in temperate  
39 regions (e.g.: temperate species have higher climatic tolerance than their tropical  
40 counterparts (Stevens 1989)), whereas biotic interactions play a major role in tropical  
41 regions (Dobzhansky 1950). Albeit this is not a new idea, our understanding of how  
42 species richness changes along latitudinal gradients can be improved by weighting the  
43 relative contributions of climatic stability and biotic interactions.

44           The aggregate effects of climatic stability and biotic interactions can be noticed,  
45 for example, when variations on temperature and rainfall can reduce the time window  
46 when resources are available for species which may generate resource bottlenecks that  
47 can limit the number of species coexisting (Williams and Middleton 2008). In fact, the  
48 climatic stability hypothesis predicts that sites with higher stability possesses higher  
49 richness than sites with lesser stability (Pianka 1966), and one of the explanations for  
50 such phenomena invokes the role of biotic interactions because climatic stability would  
51 allow species to be more specialized on stable environments (Moles and Ollerton 2016;

52 but see Schleuning et al. 2012). Direct effects of resource availability on species can  
53 also play a role in explaining the causes of the latitudinal richness pattern. For example,  
54 the number of species of woody plants has been used to explain the richness of arboreal  
55 or frugivorous mammals, and figs richness has been demonstrated to determine  
56 frugivorous birds richness (Andrews and O'Brien 2000, Kissling et al. 2007; but see  
57 Hawkins and Pausas 2004). The rationale behind this hypothesis is that an increase in  
58 species richness at basal trophic levels should increase the number of species at higher  
59 trophic levels.

60 Here, I focus on how dung beetle diversity pattern can be shaped by biotic  
61 interactions between fecal detritus producers (mammals) and consumers (dung beetles)  
62 (Nichols et al. 2016) along with climatic stability. Dung beetles (Scarabaeinae) is a rich  
63 group of detritivores beetles that probably diversified after the transition from  
64 saprophagy to coprophagy (Halffter 1991). In this study, two hypotheses will be  
65 evaluated. First, if resource availability is important for richness patterns of dung  
66 beetles then it is expected that dung beetles diversity should be driven by mammals'  
67 diversity since mammals dungs are the primordial source of food resource for dung  
68 beetles (Halffter and Matthews 1966; Nichols et al. 2009). Examples of how dung  
69 beetle diversity is related to mammal diversity are that hunting-related reductions on  
70 mammals richness lead to a reduction in dung beetles richness (Nichols et al. 2009;  
71 Culot et al. 2013) and that changes on mammals species composition may explain  
72 changes on dung beetle composition (Bogoni et al. 2016). Second, if variations on  
73 climatic stability should affect dung beetles then I expect to find that an increase in  
74 climatic stability should have positive effects on dung beetle richness. In general, many  
75 insects display seasonality patterns of diversity (Wolda 1988), and dung beetle  
76 communities, in particular, have increased richness with increased temperature and

77 reduction of rainfall seasonality (Andresen 2005; Hernández and Vaz-de-Mello 2009;  
78 Liberal et al. 2011). Climatic stability should also allow dung beetle species to be more  
79 specialized in feeding resources, therefore an increase in niche partitioning between co-  
80 occurring dung beetle species caused by trophic specialization could increase dung  
81 beetle species richness (Larsen et al. 2006), especially in tropical areas where higher  
82 mammal richness are also expected (Davies and Buckley 2011; Safi et al. 2011). Even  
83 though most dung beetles are generalists and only a few species can be sorted in guilds  
84 that use different dung types (Filgueiras et al. 2009; Bogoni and Hernandez 2014).

85 In this study, I test the hypothesis that dung beetle latitudinal richness is  
86 explained by 1) increase in feeding resources availability because of biotic interactions  
87 with mammals that produce dung beetle feeding resources, and 2) an increase on  
88 climatic stability and 3) both resource availability and climatic stability. To evaluate  
89 these hypotheses, I used a spatialized path analysis which allows dissociating the direct  
90 and indirect effects of the climatic stability. First, I predict that dung beetle richness  
91 should increase due increases in climatic stability, in other words, decreases in  
92 precipitation seasonality and temperature seasonality. Second, increases on mammals'  
93 richness, here used as a proxy for resource availability, should result in increases of  
94 dung beetle richness. Since mammals richness can also respond to precipitation  
95 seasonality and temperature seasonality, therefore climatic stability indirect effects can  
96 change dung beetle richness through mediated effects in mammals richness (See Figure  
97 1 for more details on proposed path analysis).

98

99

## 100 **Materials and Methods**

101

102 *Dung beetle database*

103 I performed a search on the Scopus database for dung beetles inventories using  
104 the following keywords: “*dung beetle*” or “*Scarabaeinae*”. I only included the period  
105 between 1980 and 2016. This search retrieved a total of 1443 articles and after applying  
106 the following criteria, the database comprised 115 studies and 213 sites (Figure 2): 1)  
107 sampled dung beetles should belong to the subfamily Scarabaeinae (in other words,  
108 studies with only Aphodinae, Geotrupinae and Troginae were excluded); 2) the study  
109 employed a standardized sampling protocol and clearly stated the number of pitfalls,  
110 sites and temporal replication used while sampling the dung beetles. Sampling protocol  
111 information was used to the measure sampling effort using in each study. The sampling  
112 effort was the total number of pitfalls measured as pitfalls multiplied per area multiplied  
113 per temporal replications. Differences on use of different baits (types of dung,  
114 decomposing meat or rotten fruits) were ignored 3) provided a list of sampled species  
115 and their respective abundances 4) sampled in the American continent and presented  
116 geographic coordinates or specified the municipality where the sampled occurred. If one  
117 study sampled more than one site and provided a geographic coordinate for each site  
118 thus each site was included on the database. However, species lists were combined in  
119 cases where there was only one geographic coordinate for multiples sites. Studies  
120 included in the analysis are available on the Supplementary File 1.

121

122 *Explanatory variables*

123 I used mammal richness as a proxy for resource availability because of biotic  
124 interactions between dung beetles and mammals (Nichols et al. 2009, 2013). In order to  
125 measure mammal richness, I downloaded the terrestrial mammals' red list range  
126 shapefile (IUCN 2016) to estimate the number of mammals richness in the locations

127 where dung beetles were sampled. For each dung beetle locality, I counted the number  
128 of mammal species' range shapefiles that overlap their coordinates using package  
129 *maptools* (Bivand and Lewin-Koh 2017).

130 Climatic stability was measured as precipitation seasonality and temperature  
131 seasonality obtained from the worldclim with 5 arc-minutes resolution (approximately  
132 10 km at equator line) (Hijmans et al. 2005). I opted for a coarser resolution because  
133 many localities had their geographic coordinates manually assigned. These variables are  
134 important drivers of mammals distribution and are commonly used on studies with  
135 species distribution of mammals (e.g.: Moura et al. 2016, Ribeiro et al. 2016). Values of  
136 precipitation seasonality and temperature seasonality were extracted for each locality  
137 using package raster (Hijmans 2016).

138 Both sampling effort and dung beetle abundance were used to control the effects  
139 of different sampling protocols and sampling efforts on dung beetle richness because  
140 measures of species richness disregarding differences in sampling effort may lead to  
141 biases estimations (Gotelli and Colwell 2001). Additionally, dung beetle abundance  
142 may change positively to increased climatic stability and resource stability because of  
143 other hypotheses (e.g.: more individuals hypothesis), therefore these confounding  
144 effects are minimized by incorporating this path in the structural model equations.  
145 Furthermore, there are cases in which dung beetle abundance may increase with a  
146 decrease in mammals' richness (Culot et al. 2013). However, this is an effect of  
147 selective defaunation of large mammals and if this effect is noticeable it should be  
148 accounted in the path analysis.

149

150 *Data Analysis*

151 A path analysis was built using the piecewise structural equation modeling  
152 approach that allows the incorporation of different models by building each model  
153 separately (Shipley 2009; Lefcheck 2016). Additionally, path analysis helps to  
154 disentangle direct and indirect effects of climatic and resources on the richness patterns  
155 (Kissling et al. 2007; Moura et al. 2016). First, I built three generalized least squares  
156 models (GLS) in order to account spatial autocorrelation using the package *nlme*  
157 (Pinheiro et al. 2014). Spatial correlation structure present on the three models was  
158 reduced by selecting the best among four spatial correlations: Spheric, Exponential,  
159 Gaussian and Rational quadratic. The first model was built using mammal richness as  
160 the response variable, precipitation seasonality and temperature seasonality as  
161 explanatory variables, and using a rational quadratic spatial correlation structure. The  
162 second model was built using dung beetle abundance as the response variable,  
163 precipitation seasonality, temperature seasonality, mammal richness and sampling effort  
164 as explanatory variables, and using an exponential spatial correlation structure. The  
165 third model was built using dung beetle richness as the response variable and  
166 precipitation seasonality, temperature seasonality, mammal richness and dung beetle  
167 abundance as explanatory variables. These three models were assembled in a path  
168 analysis using the package *piecewiseSEM* (Lefcheck 2016). The significance of the  
169 piecewise SEM was evaluated using Fisher's C statistic in which a p-value above 0.05  
170 is an indication that the model fits well to the data.

171 In all models, dung beetle abundance and dung beetle richness were log10  
172 transformed in order to achieve residuals with a normal distribution. All analyses were  
173 carried out on the R environment (R Core Team 2017). More details in model selection  
174 and models assumptions are found in the Supplementary file 2.

175

176 **Results**

177           Dung beetle richness ranged from one to 101 species (mean  $\pm$  SD = 21.5  $\pm$  17.2),  
178 whereas mammals richness ranged from three to 193 species (113.9  $\pm$  39.5). Dung  
179 beetle abundance ranged from seven to 93,274 individuals (5,226.8  $\pm$  11,606.66).

180           I found that the proposed path analysis had a good fit to the observed data  
181 (Fisher's C = 5.05; d.f. =4; P=0.282; Figure 3). Mammal richness was negatively  
182 affected both by temperature seasonality and precipitation seasonality ( $R^2=71.31\%$ )  
183 whereas dung beetle abundance variation was explained only by sampling effort  
184 ( $R^2=9.03\%$ ).

185           In the model, 56.32% of the variation on dung beetle richness was explained. An  
186 increase on four units of dung beetle abundance resulted on an increase of one unit on  
187 dung beetle richness ( $b = 0.2472$ ), and an increase of mammal richness resulted on an  
188 increase of dung beetle richness ( $b_{\log_{10}}=0.0023$ ;  $b_{\text{antilog}}= 1.01$ ). As expected, negative  
189 effects on dung beetle richness included a direct and an indirect effect, modulated  
190 through mammal richness, of temperature seasonality ( $b_{\text{direct}}=-0.0001$  and  $b_{\text{indirect}}= -$   
191  $0.00003$ ), but only indirect effects of precipitation seasonality dung beetle richness  
192 ( $b_{\text{indirect}}= -0.0005$ ).

193

194 **Discussion**

195           Here I have corroborated my hypothesis that dung beetle richness was higher in  
196 areas with higher climatic stability and higher resource availability. Despite this, dung  
197 beetle abundance was poorly explained on the model and that could be a consequence of  
198 lack of standardization between sampling protocols of studies (Larsen and Forsyth  
199 2005; da Silva and Hernández 2015). As far as I have know, this is among the firsts  
200 empirical assessments of dung beetle richness pattern (see: Frank et al. 2018), since



201 only anecdotal evidence and local scale assessments were previously made (Halffter and  
202 Matthews 1966; Hernández and Vaz-de-Mello 2009; Liberal et al. 2011).

203 Two non-exclusive explanations help to understand why there are more dung  
204 beetle species on areas with more resources available (i.e. higher mammals' richness).  
205 First, an increase on resource availability should allow dung beetles to specialize on  
206 certain types of dung (e.g.: Larsen et al. 2006, Jacobs et al. 2008) and reduce  
207 interspecific competition between dung beetles. However, a recent study has shown an  
208 opposite trend – dung beetles have low specificity on resource use even on communities  
209 with high richness (Frank et al. 2018). Second, an increase in mammal richness could  
210 result in an increase of different traits and lineages of mammals (Safi et al. 2011). That,  
211 in turn, can increase the number of mammals with different activity times (e.g.: diurnal  
212 or nocturnal) and with different feeding and digestive systems (e.g.: herbivores or  
213 carnivores). Indeed, dung beetle community structure changes between night and day  
214 (Lopes et al. 2011) or depending on dung type used as bait (Filgueiras et al. 2009).

215 Climatic instability affects directly the time of activity when dung beetles can be  
216 active due to physiological constraints, mostly of small dung beetles (<2g) that are  
217 thermoconformers (Verdú et al. 2006). Considering that areas with more climatic  
218 instability should have a higher variation on temperature during the day and during the  
219 year, this could in turn limit the number of dung beetles species active. Additionally,  
220 climatic instability should also increase the number of generalist dung beetle species in  
221 order to deal with a decrease on resource availability, climatic instability also reduces  
222 the number of mammals' species, which reduces dung beetle species due to interspecific  
223 competition (Finke and Snyder 2008). Surprisingly, dung beetle richness was not  
224 directly affected by precipitation seasonality. This once again points towards climatic  
225 instability having an indirect effect through resource availability.

226           Here I had shown the importance of incorporating biotic interactions, here as  
227 trophic relationships between dung beetles and mammals, in order to decouple direct  
228 and indirect effects of climatic on species richness patterns, particularly because  
229 patterns of trophic groups can arise from random effects (Gaston 2000). For example, a  
230 study revealed that congruent pattern of richness found with ants and trees are mostly  
231 explained by similar responses to environmental gradients (Vasconcelos et al. 2019).  
232 Furthermore, I show analytical evidence that dung beetle richness is largely affected by  
233 mammals' richness and that mammal's richness can mediate climatic instability effects  
234 on dung beetles. My finding increases the understanding of the intrinsic relationship  
235 between detritivore (dung beetle) and producers (mammals) which have an important  
236 role in ecosystem services (e.g.: nutrient cycling and seed dispersal) (Nichols et al.  
237 2009) and since dung beetle are widely dependent of mammals conservation actions  
238 must take in consideration the need to preserve the actors involved in the detritus food  
239 web in order to conserve these ecosystem services.

240

241

242 **References**

- 243 Andresen E (2005) Effects of Season and Vegetation Type on Community Organization  
244 of Dung Beetles in a Tropical Dry Forest. *Biotropica* 37:291–300. doi:  
245 10.1111/j.1744-7429.2005.00039.x
- 246 Andrews P, O'Brien EM (2000) Climate, vegetation, and predictable gradients in  
247 mammal species richness in southern Africa. *J Zool* 251:205–231. doi:  
248 10.1111/j.1469-7998.2000.tb00605.x
- 249 Bivand R, Lewin-Koh N (2017) maptools: Tools for Reading and Handling Spatial  
250 Objects. R package version 0.9-2. <https://cran.r-project.org/package=maptools>
- 251 Bogoni J a., Hernandez MIM (2014) Attractiveness of Native Mammal's Feces of  
252 Different Trophic Guilds to Dung Beetles (Coleoptera: Scarabaeinae). *J Insect Sci*  
253 14:299–299. doi: 10.1093/jisesa/ieu161
- 254 Bogoni JA, Graipel ME, de Castilho PV, et al (2016) Contributions of the mammal  
255 community, habitat structure, and spatial distance to dung beetle community  
256 structure. *Biodivers Conserv* 25:1661–1675. doi: 10.1007/s10531-016-1147-1
- 257 Culot L, Bovy E, Zagury Vaz-de-Mello F, et al (2013) Selective defaunation affects  
258 dung beetle communities in continuous Atlantic rainforest. *Biol Conserv* 163:79–  
259 89. doi: 10.1016/j.biocon.2013.04.004
- 260 da Silva PG, Hernández MIM (2015) Spatial Patterns of Movement of Dung Beetle  
261 Species in a Tropical Forest Suggest a New Trap Spacing for Dung Beetle  
262 Biodiversity Studies. *PLoS One* 10:e0126112. doi: 10.1371/journal.pone.0126112
- 263 Davies TJ, Buckley LB (2011) Phylogenetic diversity as a window into the evolutionary  
264 and biogeographic histories of present-day richness gradients for mammals. *Philos*  
265 *Trans R Soc B Biol Sci* 366:2414–2425. doi: 10.1098/rstb.2011.0058
- 266 Dobzhansky T (1950) Evolution in the Tropics. *Am Sci* 38:209–221

- 267 Field R, Hawkins B a., Cornell H V., et al (2009) Spatial species-richness gradients  
268 across scales: A meta-analysis. *J Biogeogr* 36:132–147. doi: 10.1111/j.1365-  
269 2699.2008.01963.x
- 270 Filgueiras BKC, Liberal CN, Aguiar CDM, et al (2009) Attractivity of omnivore,  
271 carnivore and herbivore mammalian dung to Scarabaeinae (Coleoptera,  
272 Scarabaeidae) in a tropical Atlantic rainforest remnant. *Rev Bras Entomol* 53:422–  
273 427. doi: 10.1590/S0085-56262009000300017
- 274 Finke DL, Snyder WE (2008) Niche Increases Resource Partitioning by Diverse  
275 Communities Exploitation. *Science* (80- ) 321:1488–1490. doi:  
276 10.1126/science.1160854
- 277 Frank K, Krell F-T, Slade EM, et al (2018) Global dung webs: high trophic generalism  
278 of dung beetles along the latitudinal diversity gradient. *Ecol Lett* 21:1229–1236.  
279 doi: 10.1111/ele.13095
- 280 Gaston KJ (2000) Global patterns in biodiversity. *Nature* 405:220–227. doi:  
281 10.1038/35012228
- 282 Gotelli NJ, Colwell RK (2001) Quantifying biodiversity: procedures and pitfalls in the  
283 measurement and comparison of species richness. *Ecol Lett* 4:379–391. doi:  
284 10.1046/j.1461-0248.2001.00230.x
- 285 Halffter G (1991) Historical and Ecological Factors Determining the Geographical  
286 Distribution of Beetles (Coleoptera Scarabaeidae: Scarabaeinae). *Folia*  
287 *Entomológica Mex* 82:194–238
- 288 Halffter G, Matthews E (1966) The Natural History of Dung Beetles of the Subfamily  
289 Scarabaeinae (Coleoptera, Scarabaeidae). *Folia Entomol Mex* 12–14:1–312
- 290 Hawkins BA, Diniz-Filho JAF (2004) “Latitude” and Geographic Patterns in Species  
291 Richness. *Ecography (Cop)* 27:268–272. doi: 10.1111/j.0906-7590.2004.03883.x

- 292 Hawkins BA, Pausas JG (2004) Does plant richness influence animal richness?: The  
293 mammals of Catalonia (NE Spain). *Divers Distrib* 10:247–252. doi:  
294 10.1111/j.1366-9516.2004.00085.x
- 295 Hernández MIM, Vaz-de-Mello FZ (2009) Seasonal and spatial species richness  
296 variation of dung beetle (Coleoptera, Scarabaeidae s. str.) in the Atlantic Forest of  
297 southeastern Brazil. *Rev Bras Entomol* 53:607–613. doi: 10.1590/S0085-  
298 56262009000400010
- 299 Hijmans RJ (2016) raster: Geographic Data Analysis and Modeling. R package version  
300 2.5-8. <https://CRAN.R-project.org/package=raster>
- 301 Hijmans RJ, Cameron SE, Parra JL, et al (2005) Very high resolution interpolated  
302 climate surfaces for global land areas. *Int J Climatol* 25:1965–1978. doi:  
303 10.1002/joc.1276
- 304 Hillebrand H (2004) On the Generality of the Latitudinal Diversity Gradient. *Am Nat*  
305 163:192–211. doi: 10.2307/2678832
- 306 IUCN (2016) The IUCN Red List of Threatened Species. Version 2016-1.  
307 <http://www.iucnredlist.org>
- 308 Jacobs J, Nole I, Palminteri S, Ratcliffe B (2008) First come, first serve: “sit and wait”  
309 behavior in dung beetles at the source of primate dung. *Neotrop Entomol* 37:641–5
- 310 Kissling WD, Rahbek C, Bohning-Gaese K (2007) Food plant diversity as broad-scale  
311 determinant of avian frugivore richness. *Proc R Soc B Biol Sci* 274:799–808. doi:  
312 10.1098/rspb.2006.0311
- 313 Larsen TH, Forsyth A (2005) Trap Spacing and Transect Design for Dung Beetle  
314 Biodiversity Studies. *Biotropica* 37:322–325
- 315 Larsen TH, Lopera A, Forsyth A (2006) Extreme trophic and habitat specialization by  
316 Peruvian dung beetles (Coleoptera: Scarabaeidae: Scarabaeinae). *Coleopt Bull*

- 317 60:315–324
- 318 Lefcheck JS (2016) piecewiseSEM: Piecewise structural equation modelling in r for  
319 ecology, evolution, and systematics. *Methods Ecol Evol* 7:573–579. doi:  
320 10.1111/2041-210X.12512
- 321 Liberal CN, Isidro de Farias Â., Meiado MV, et al (2011) How habitat change and  
322 rainfall affect dung beetle diversity in Caatinga, a Brazilian semi-arid ecosystem. *J*  
323 *Insect Sci* 11:1–11
- 324 Lopes J, Korasaki V, Catelli LL, et al (2011) A comparison of dung beetle assemblage  
325 structure (Coleoptera: Scarabaeidae: Scarabaeinae) between an Atlantic forest  
326 fragment and adjacent abandoned pasture in Paraná, Brazil. *Zool (Curitiba,*  
327 *Impresso)* 28:72–79. doi: 10.1590/S1984-46702011000100011
- 328 Mittelbach GG, Schemske DW, Cornell H V., et al (2007) Evolution and the latitudinal  
329 diversity gradient: Speciation, extinction and biogeography. *Ecol Lett* 10:315–331.  
330 doi: 10.1111/j.1461-0248.2007.01020.x
- 331 Moles AT, Ollerton J (2016) Is the notion that species interactions are stronger and  
332 more specialized in the tropics a zombie idea? *Biotropica* 48:141–145. doi:  
333 10.1111/btp.12281
- 334 Moura MR, Villalobos F, Costa GC, Garcia PCA (2016) Disentangling the Role of  
335 Climate, Topography and Vegetation in Species Richness Gradients. *PLoS One*  
336 11:e0152468. doi: 10.1371/journal.pone.0152468
- 337 Nichols E, Gardner T a., Peres C a., Spector S (2009) Co-declining mammals and dung  
338 beetles: an impending ecological cascade. *Oikos* 118:481–487. doi:  
339 10.1111/j.1600-0706.2008.17268.x
- 340 Nichols E, Peres CA, Hawes JE, Naeem S (2016) Multitrophic diversity effects of  
341 network degradation. *Ecol Evol* 6:4936–4946. doi: 10.1002/ece3.2253

- 342 Nichols E, Uriarte M, Peres C a, et al (2013) Human-Induced Trophic Cascades along  
343 the Fecal Detritus Pathway. PLoS One 8:e75819. doi:  
344 10.1371/journal.pone.0075819
- 345 Pianka ER (1966) Latitudinal Gradients in Species Diversity: A Review of Concepts.  
346 Am Nat 100:33. doi: 10.1086/282398
- 347 Pinheiro J, Bates D, DebRoy S, et al (2014) nlme: Linear and Nonlinear Mixed Effects  
348 Models\_. R package version 3.1-117, URL: [http://CRAN.R-](http://CRAN.R-project.org/package=nlme)  
349 [project.org/package=nlme](http://CRAN.R-project.org/package=nlme)
- 350 R Core Team (2017) R: A language and environment for statistical computing. R  
351 Foundation for Statistical Computing, Vienna, Austria. URL [https://www.R-](https://www.R-project.org/)  
352 [project.org/](https://www.R-project.org/).
- 353 Ribeiro BR, Sales LP, De Marco P, Loyola R (2016) Assessing Mammal Exposure to  
354 Climate Change in the Brazilian Amazon. PLoS One 11:e0165073. doi:  
355 10.1371/journal.pone.0165073
- 356 Safi K, Cianciaruso M V., Loyola RD, et al (2011) Understanding global patterns of  
357 mammalian functional and phylogenetic diversity. Philos Trans R Soc B Biol Sci  
358 366:2536–2544. doi: 10.1098/rstb.2011.0024
- 359 Schleuning M, Fründ J, Klein AM, et al (2012) Specialization of mutualistic interaction  
360 networks decreases toward tropical latitudes. Curr Biol 22:1925–1931. doi:  
361 10.1016/j.cub.2012.08.015
- 362 Shipley B (2009) Confirmatory path analysis in a generalized multilevel context.  
363 Ecology 90:363–368. doi: 10.1890/08-1034.1
- 364 Stevens GC (1989) The latitudinal gradient in geographic range: how so many species  
365 coexist in the tropics. Am Nat 133:240–256
- 366 Vasconcelos HL, Maravalhas JB, Neves KC, et al (2019) Congruent spatial patterns of

- 367 ant and tree diversity in Neotropical savannas. *Biodivers Conserv* 28:1075–1089.  
368 doi: 10.1007/s10531-019-01708-9
- 369 Verdú JR, Arellano L, Numa C (2006) Thermoregulation in endothermic dung beetles  
370 (Coleoptera: Scarabaeidae): effect of body size and ecophysiological constraints in  
371 flight. *J Insect Physiol* 52:854–60. doi: 10.1016/j.jinsphys.2006.05.005
- 372 Williams SE, Middleton J (2008) Climatic seasonality, resource bottlenecks, and  
373 abundance of rainforest birds: Implications for global climate change. *Divers*  
374 *Distrib* 14:69–77. doi: 10.1111/j.1472-4642.2007.00418.x
- 375 Willig MR, Kaufman DM, Stevens RD (2003) Latitudinal Gradients of Biodiversity:  
376 Pattern, Process, Scale, and Synthesis. *Annu Rev Ecol Evol Syst* 34:273–309. doi:  
377 10.1146/annurev.ecolsys.34.012103.144032
- 378 Wolda H (1988) Insect seasonality: why? *Annu Rev Ecol Syst* 19:1–18  
379  
380



381 Figure 1. Path analysis representing the theoretical relationships between predictors of  
382 dung beetle richness. Black arrows are negative effects while gray arrows are  
383 positive relationships.

384 Figure 2. Localities of the 115 dung beetle inventories performed on the America  
385 continent and used on the analysis.

386 Figure 3. Observed path analysis used to predict dung beetle richness. Dashed arrows  
387 are non-significant relationships between variables ( $p>0.05$ ) while continuous arrows  
388 are significant relationships ( $p<0.05$ ). Black arrows are negative effects while dark gray  
389 arrows are positive effects. Double arrow represents correlations between exogenous  
390 variables. Note that both dung beetle richness and dung beetle abundance was log  
391 transformed.

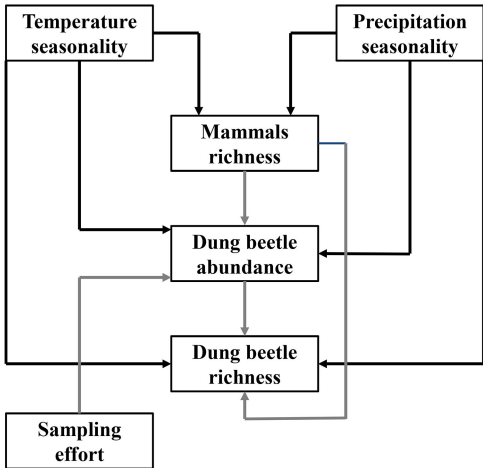

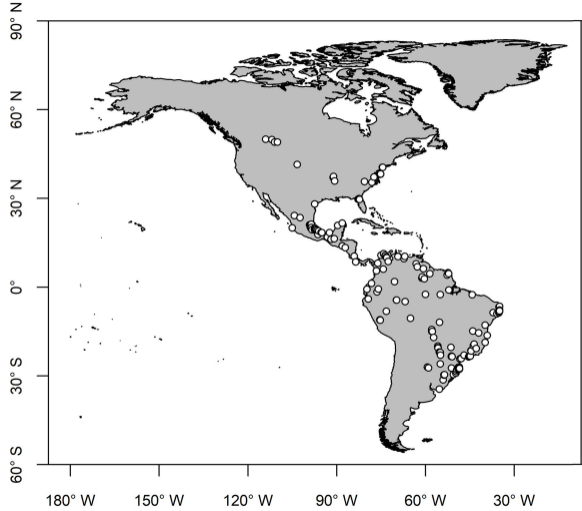

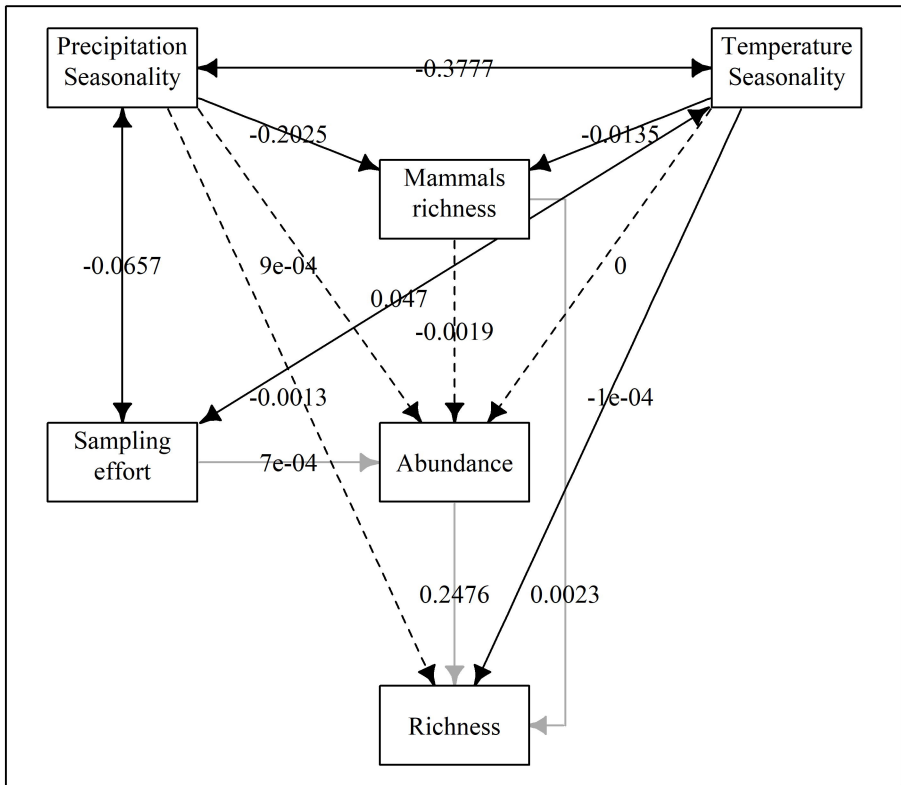

Source: https://www.biorxiv.org/content/10.1101/402537v2.full.pdf
